# Supplementary material for: Pyroelectric catalytic performance of Sm3+-modified Pb(Mg1/3Nb2/3)O3–PbTiO3 for organic dyes: degradation efficiency, kinetics and pyroelectric catalytic mechanism
Source: Royal Society of Chemistry journal article supplement (doi:10.1039/d3dt02395h), 2023-01-01
Supplement: d3dt02395h1.pdf [file d3dt02395h1.pdf]

Supplementary materials for

**Pyroelectric catalytic performances of Sm<sup>3+</sup>-modified Pb(Mg<sub>1/3</sub>Nb<sub>2/3</sub>)O<sub>3</sub>-PbTiO<sub>3</sub> for organic dyes: degradation efficiency, kinetics and pyroelectric catalytic mechanism**

Xinyi Lin<sup>a</sup>, Jina Ding<sup>b,\*</sup>, Xiaohua Li<sup>a</sup>, Zhuo Tang<sup>a</sup>, Hongbing Chen<sup>a</sup>, Huan Dong<sup>a</sup>, Anhua Wu<sup>c</sup>, Linwen Jiang<sup>a,\*</sup>

<sup>a</sup>School of Materials Science and Chemical Engineering, State Key Laboratory Base of Novel Functional Materials and Preparation Science, Ningbo University, Ningbo 315211, P. R. China

<sup>b</sup>State Key Laboratory for Managing Biotic and Chemical Threats to the Quality and Safety of Agro-products, Institute of Plant Virology, Ningbo University, Ningbo 315211, P. R. China

<sup>c</sup>Shanghai Institute of Ceramics, Chinese Academy of Sciences, Shanghai 201800, P. R. China

\*Corresponding author.

E-mail addresses: dingjina@nbu.edu.cn (Jina Ding), jianglinwen@nbu.edu.cn (Linwen Jiang).

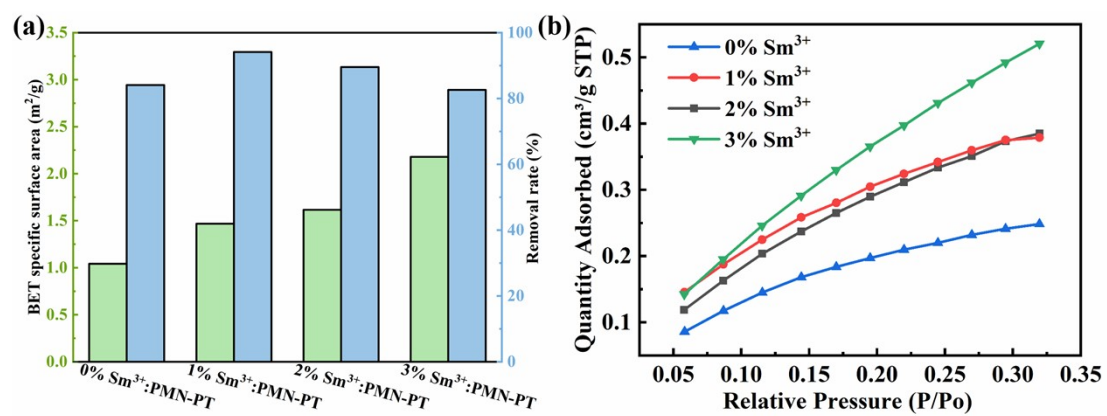

**Figure S1** (a) Degradation rate and specific surface area at different Sm<sup>3+</sup> contents, (b) Specific surface area curve.
